# Supplementary material
Source: publisher figshare collection journal article supplement (https://asha.figshare.com/articles/dataset/_/12931691)

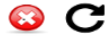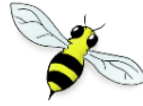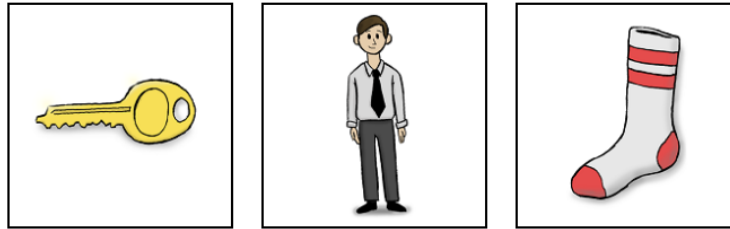

**Supplemental Material S1.** Rhyming example.

Supplement: Supplementary file 1 [file 1]

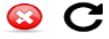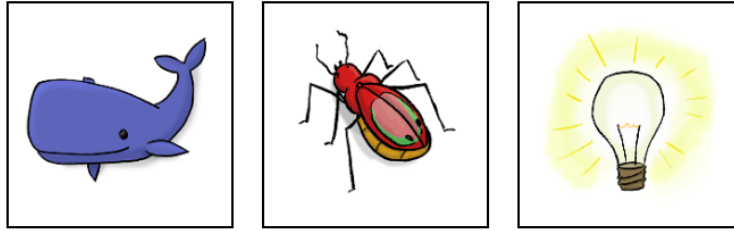

**Supplemental Material S3.** Segmentation example.

Supplement: Supplementary file 2 [file 1]

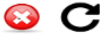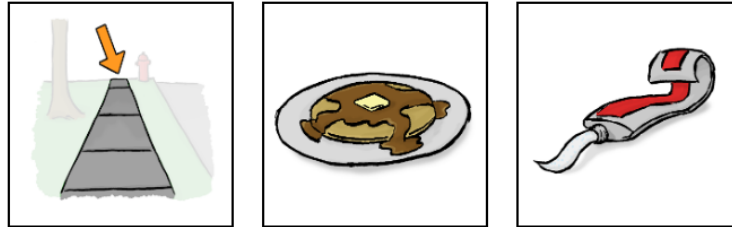

**Supplemental Material S2.** Blending example.

Supplement: Supplementary file 3 [file 1]
